# Supplementary material for: Altered expression of miRNAs and methylation of their promoters are correlated in neuroblastoma
Source: PubMed Central journal article supplement (PMC5347773; doi:10.18632/oncotarget.13090), 2016-11-04
Supplement: oncotarget-07-83330-s001.pdf [file oncotarget-07-83330-s001.pdf]

# Altered expression of miRNAs and methylation of their promoters are correlated in neuroblastoma

## SUPPLEMENTARY FIGURES AND TABLES

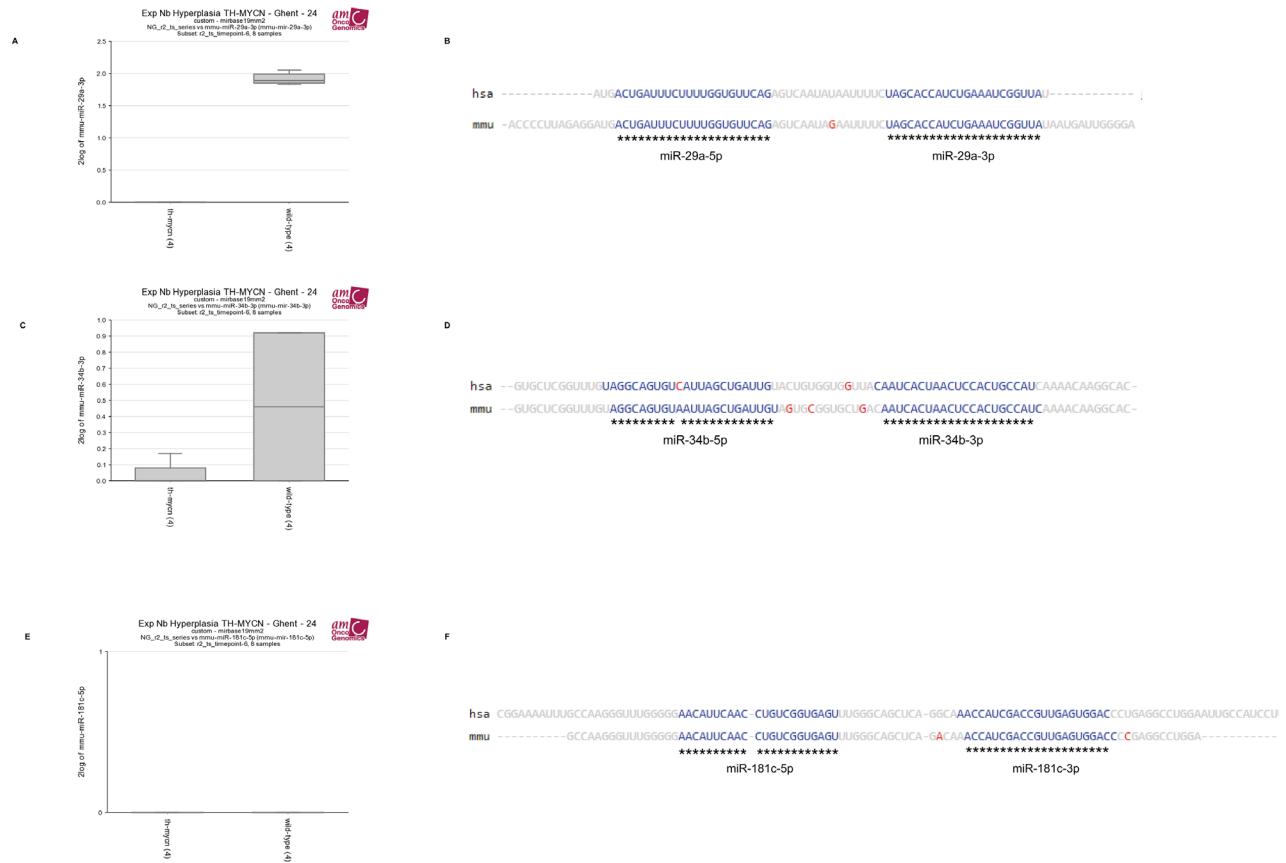

**Supplementary Figure S1: Box plots of the expression of mmu-miR-29a-3p A, mmu-miR-34b-3p C, mmu-miR-181c-5p E, in neuroblastoma (th-mycn) and control (wild-type) samples (data from Neuroblastoma Ghent, Array Express: E-MTAB-2618, analyzed and visualized through R2 platform). Conservation of pre-miR-29a B, pre-miR-34b D, and pre-miR-181c F, sequences between *Homo sapiens* (hsa) and *Mus musculus* (mmu), identified through microRNAviewer (<http://people.csail.mit.edu/akiezun/microRNAviewer/index.html>).**

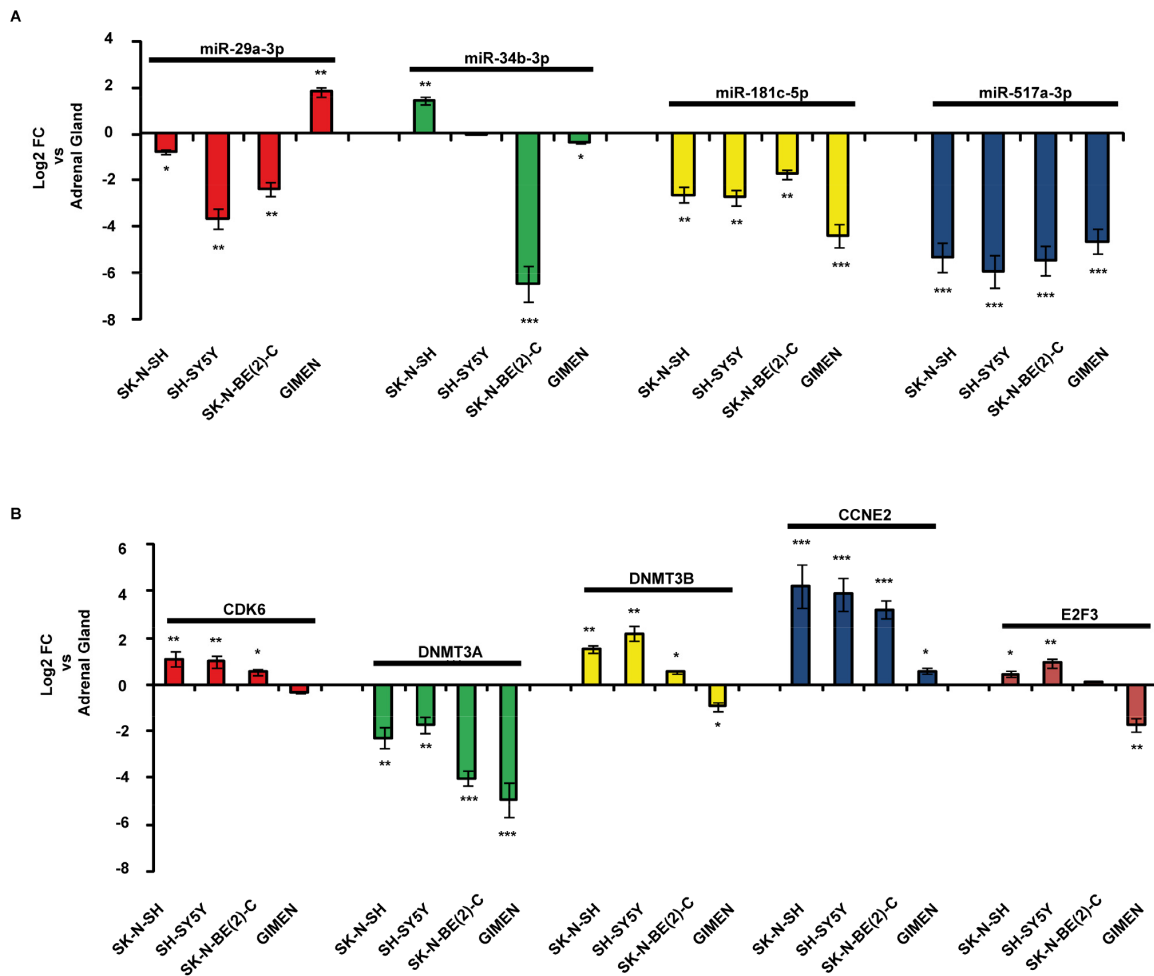

**Supplementary Figure S2: Expression of miRNAs 29a-3p, 34b-3p, 181c-5p, 517a-3p A. and CDK6, DNMT3A/B (targets of miR-29a-3p), CCNE2, E2F3 (targets of miR-34b-3p) B. in GIMEN, SK-N-BE(2)-C, SK-N-SH, SH-SY5Y neuroblastoma cell lines.** Expression values are reported as Log2 of the fold change (FC) versus the adrenal gland. Mir-191-5p and HPRT have been used as reference genes for miRNAs and protein-encoding genes assays, respectively. \* p-value < 0.05, \*\* p-value < 0.01, \*\*\* p-value < 0.001, Student's t-test (n = 3).

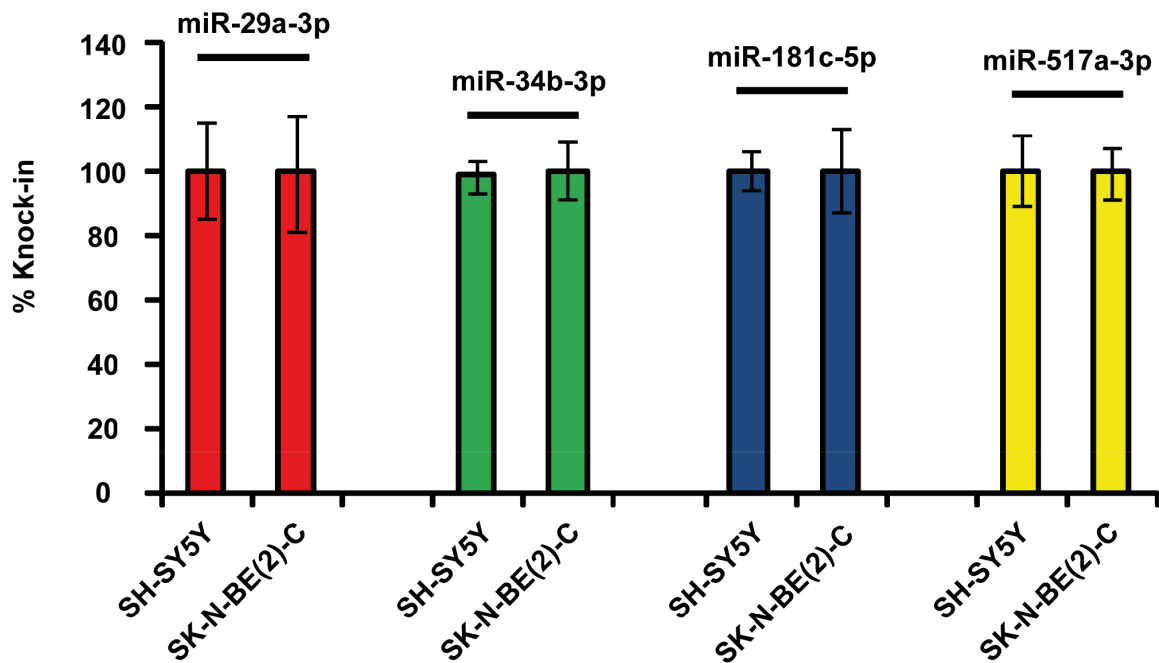

Supplementary Figure S3: MiR-29a-3p, miR-34b-3p, miR-181c-5p, miR-517a-3p knock-in efficiencies (%) after transfection (time point 24h) of SK-N-BE(2)-C and SH-SY5Y with specific miRNA mimics. Data are reported as mean  $\pm$  standard deviation of three independent experiments.

**DNMT3A vs miR-29a-3p**

```

3' auuGGCUAAAGU-CUACCACGAu 5' hsa-miR-29a
      ||| | ||| | ||| ||| |||
847:5' aacCCGACUUCAUAAUGGUGCUu 3' DNMT3A

```

**DNMT3B vs miR-29a-3p**

```

3' auuggcuaaagucuaCCACGAu 5' hsa-miR-29a
      ||| |||
217:5' ggagcagccuaaacacGGUGCUc 3' DNMT3B

```

```

3' auuggcuaaagucuaCCACGAu 5' hsa-miR-29a
      ||| |||
1054:5' aaaacugcaaagcucGGUGCUc 3' DNMT3B

```

```

3' auUGGCUAAAGUCUACCACGAu 5' hsa-miR-29a
      ||: | |:| ||| |||
1189:5' uuACUCUUCUUA-CUGGUGCUa 3' DNMT3B

```

**CDK6 vs miR-29a-3p**

```

3' auuggcuaAAGUCUACCACGAu 5' hsa-miR-29a
      | | | ||| ||| |||
8693:5' cuggcuugUCCACAUUGGUGCUc 3' CDK6

```

```

3' auUGGCUAA--AGUC--UACCACGAu 5' hsa-miR-29a
      || | | | | | | | ||| |||
9120:5' cuACAGAAUGCUCUGUUUUGGUGCUu 3' CDK6

```

```

3' auuggcuaaagucuaCCACGAu 5' hsa-miR-29a
      ||| |||
9874:5' cuggaugucuuacugGGUGCUa 3' CDK6

```

**E2F3 vs miR-34b-3p**

```

3' uaccgucaCCUCAUCACUAAc 5' hsa-miR-34b
      ||: || | ||| |||
3002:5' uuuccuacGGGUACGUGAUUu 3' E2F3

```

**BCL2 vs miR-34b-3p**

```

3' uaccgucaccUCAUCACUAAc 5' hsa-miR-34b
      || | ||| |||
3484:5' gggaaaaauuAGGAAGUGAUUa 3' BCL2

```

**BCL2 vs miR-181c-5p**

```

3' ugaguggcuguccaaCUUACAa 5' hsa-miR-181c
      ||| |||
1063:5' ggcaguguggucuccGAAUGUc 3' BCL2

```

```

3' ugaguggcuguccaaCUUACAa 5' hsa-miR-181c
      ||| |||
1737:5' ucuguauuaacuugGAAUGUa 3' BCL2

```

**Supplementary Figure S4: Candidate miRNAs' binding sites retrieved by miRanda-mirSVR (<http://www.microrna.org/microrna/home.do>).**

## Neuroblastoma - Stage 4 - no amp MYCN

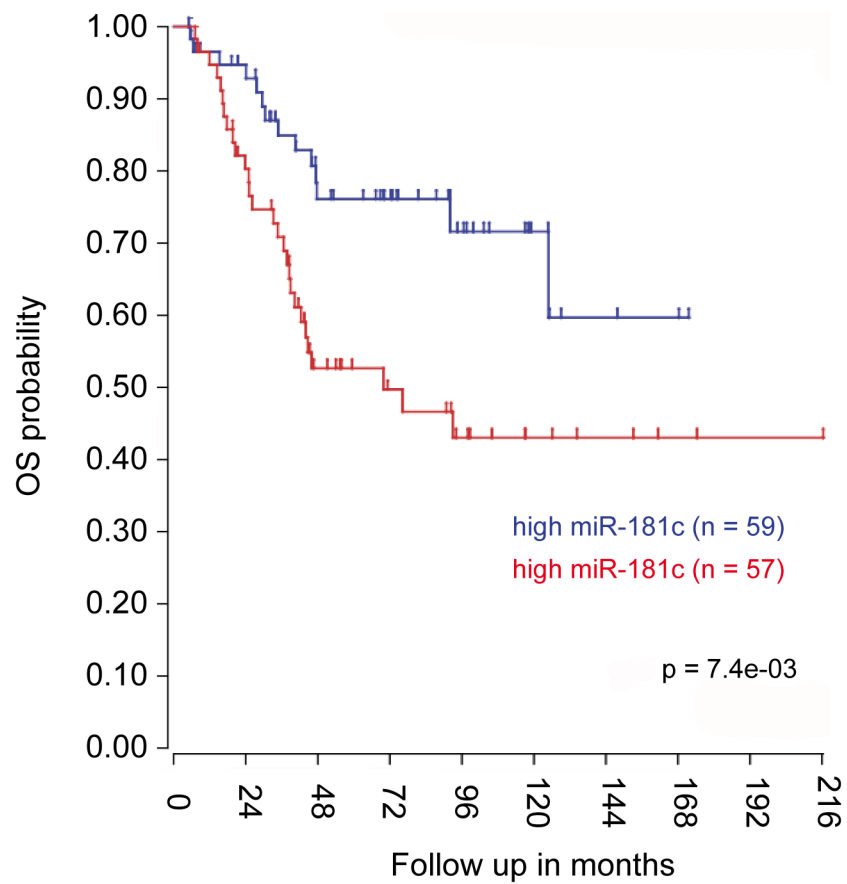

**Supplementary Figure S5: miR-181c expression and stage 4 neuroblastoma patients' overall survival (OS).** Stage 4 neuroblastoma patients with no amplified MYCN and lower miR-181c's expression have a worse prognosis with respect to the same patients with higher miR-181c expression. The cut off modulus for miR-181c expression to draw Kaplan-Meier curves derives from the scan setting.

**Supplementary Table S1: DE miRNAs from TLDA data. Not DE: not differentially expressed**

See Supplementary File 1

**Supplementary Table S2: Selection of DE miRNAs, based on their potential involvement in neuroblastoma (DE: differentially expressed; TS: tumor suppressor)**

See Supplementary File 2

**Supplementary Table S3: Detailed data on the methylation status within the CpG islands analyzed. For each genomic region investigated, percentage of methylation (%) of single CpG and the mean value are indicated for each cell line, both in controls (C) and after 5'-AZA treatment (Aza)**

See Supplementary File 3

**Supplementary Table S4: Selection of candidate miRNA targets**

See Supplementary File 4

Supplementary Table S5: Target miRNA's binding site conservation (by TargetScan release 7.1)

| miRNA           | miRNA target  | Conserved miRNA binding site (within target's 3'-UTR) | seed match |
|-----------------|---------------|-------------------------------------------------------|------------|
| hsa-miR-29a-3p  | <b>DNMT3A</b> | 862-868                                               | 7mer-m8    |
| hsa-miR-29a-3p  | <b>DNMT3A</b> | 1305-1311                                             | 7mer-m8    |
| hsa-miR-29a-3p  | <b>DNMT3A</b> | 5559-5565                                             | 7mer-1A    |
| hsa-miR-29a-3p  | <b>DNMT3B</b> | 1202-1209                                             | 8mer       |
| hsa-miR-29a-3p  | <b>CDK6</b>   | 9138-9144                                             | 7mer-m8    |
| hsa-miR-29a-3p  | <b>CDK6</b>   | 9889-9895                                             | 7mer-1A    |
| hsa-miR-181c-5p | <b>BCL2</b>   | 1752-1758                                             | 7mer-1A    |
| hsa-miR-181c-5p | <b>BCL2</b>   | 2896-2903                                             | 8mer       |

Supplementary Table S6: *Hub nodes* within candidate miRNA targets' network

| Gene symbol      | Betweenness | Closeness   | Degree | Stress  |
|------------------|-------------|-------------|--------|---------|
| CCNE1            | 1806.717681 | 0.004739336 | 45     | 10734   |
| TAF1             | 1413.695084 | 0.004950495 | 45     | 9058    |
| E2F4             | 1245.067842 | 0.005235602 | 49     | 9002    |
| E2F1             | 1215.444905 | 0.005128205 | 48     | 8058    |
| E2F3             | 1156.78274  | 0.004694836 | 38     | 7036    |
| CDK2             | 807.1252773 | 0.004830918 | 40     | 6286    |
| CCND1            | 745.7136432 | 0.004784689 | 34     | 5194    |
| MYC              | 692.4908549 | 0.004694836 | 33     | 5610    |
| RB1              | 651.1623185 | 0.005       | 39     | 6384    |
| HDAC1            | 627.2007473 | 0.004237288 | 22     | 5460    |
| CDK6             | 595.552135  | 0.004273504 | 29     | 4264    |
| CDKN1A           | 587.1190398 | 0.004878049 | 36     | 4952    |
| RBL2             | 575.4836829 | 0.004878049 | 34     | 5362    |
| CDK4             | 500.0384738 | 0.004405286 | 28     | 4146    |
| HNF4A            | 433.1309052 | 0.004504505 | 30     | 3326    |
| AR               | 390.4186935 | 0.004329004 | 23     | 2692    |
| DNMT3A           | 333.0231604 | 0.003546099 | 17     | 3128    |
| DNMT3B           | 296.9462477 | 0.003333333 | 20     | 2790    |
| CDKN1B           | 231.6297088 | 0.004651163 | 30     | 2682    |
| CDC2             | 203.2643065 | 0.004444444 | 24     | 2542    |
| CBX5             | 186.4977572 | 0.004115226 | 15     | 2320    |
| <b>Threshold</b> | 147.95      | 0.0038      | 12.1   | 1213.27 |
